# Supplementary material for: Recent Transmission Clustering of HIV-1 C and CRF17_BF Strains Characterized by NNRTI-Related Mutations among Newly Diagnosed Men in Central Italy
Source: PLoS One. 2015 Aug 13;10(8):e0135325. doi: 10.1371/journal.pone.0135325 (PMC4535860; doi:10.1371/journal.pone.0135325)
Supplement: S1 Appendix — (PDF) [file pone.0135325.s002.pdf]

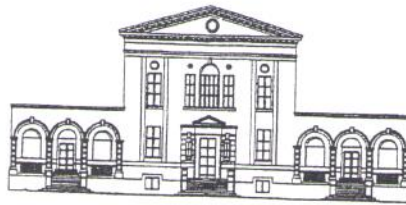

*Istituto Nazionale per le Malattie Infettive  
LAZZARO SPALLANZANI  
Istituto di Ricovero e Cura a Carattere Scientifico  
Comitato Etico*

ISTITUTO NAZIONALE PER LE MALATTIE INFETTIVE  
"LAZZARO SPALLANZANI" - I.R.C.C.S.  
Via Portuense n. 292 - 00149 ROMA  
COMITATO ETICO  
COPIA CONFORME ALL'ORIGINALE  
COMPOSTA DA N. 3 FOGLI  
IL SEGRETARIO 29

**OGGETTO:** Approvazione nuova versione Protocollo di studio  
**TITOLO:** "Studio trasversale sulle caratteristiche epidemiologiche e comportamentali delle persone con nuova diagnosi di infezione da HIV"  
**PARERE N.** 51 del Registro delle Sperimentazioni

#### **IL COMITATO ETICO**

**dell'Istituto Nazionale per le Malattie Infettive Lazzaro Spallanzani I.R.C.C.S.**

(Istituito con Deliberazione n. 65 del 27/06/96, modificato nella sua composizione da ultimo con la Deliberazione n. 229 del 20/03/2002, il cui funzionamento è disciplinato dal Regolamento adottato con Deliberazione n. 119 del 26/04/1997, da ultimo modificato con Deliberazione n. 390 del 03/08/2000, in possesso dei requisiti di cui al Decreto del Ministro della Sanità del 15 luglio 1997 e del 18 marzo 1998)

RIUNITO IL 18/12/2003

VISTA

La richiesta presentata dal Dott. Enrico Girardi in data 28/11/2003

ESAMINATA

La documentazione fornita a corredo della richiesta stessa, tra cui:

- ☒ Protocollo versione n. 2.1 del 26.11.2003
- ☒ Sinossi del protocollo
- ☒ Modulo di Consenso Informato scritto versione n. 2.1 del 26.11.2003
- ☒ Questionario versione n. 2.1 del 26.11.2003

SENTITI

I relatori designati per l'approfondimento dello studio,

VALUTATI

I seguenti aspetti, ove applicabili, ai fini dell'approvazione dello studio:

- Conformità ai principi etici che traggono la loro origine dalle fonti di cui all'art. 2 del Regolamento del Comitato Etico
- Conformità ai principi di Buona Pratica Clinica (GCP) e alle disposizioni normative applicabili
- Conformità ai principi contenuti nel Regolamento delle Sperimentazioni e delle altre ricerche biomediche dell'Istituto Lazzaro Spallanzani
- Rispetto delle regole di riservatezza e confidenzialità previste dalle disposizioni normative applicabili
- Salvaguardia dei diritti, sicurezza e benessere dei soggetti partecipanti allo studio
- Validità scientifica e giustificazione etica dello studio
- Correttezza del disegno sperimentale
- Completezza e chiarezza del modulo di consenso informato e di ogni altra informazione scritta per i soggetti dello studio
- Adeguatezza del rapporto rischi prevedibili/benefici attesi

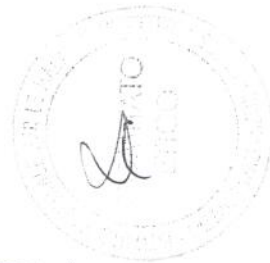

- Correttezza delle procedure di reclutamento dei soggetti
- Giustificazione delle indagini e/o terapie proposte
- Idonea qualificazione dello sperimentatore e di tutte le persone coinvolte nello studio
- Adeguatazza degli spazi e delle risorse di personale, strutturali e tecnologiche disponibili
- Copertura di tutte le spese aggiuntive che l'Istituto dovrà affrontare per effetto della sperimentazione
- Idonea copertura assicurativa dei soggetti dello studio e degli sperimentatori

#### APPROVA

La nuova versione del protocollo relativo allo studio in oggetto, da attuarsi presso l'Istituto, sotto la responsabilità scientifica del Dott. Enrico Girardi, Dirigente medico in servizio presso il Dipartimento di Epidemiologia

Si invita, altresì, il Responsabile dello studio a:

- Comunicare per iscritto l'inizio, l'eventuale interruzione e la conclusione dello studio
- Trasmettere una relazione sullo stato di avanzamento dello studio, con periodicità semestrale, e una relazione finale
- Trasmettere eventuali modifiche al Protocollo e/o al modulo di Consenso Informato scritto

**Il Presidente del Comitato Etico**  
**(Prof. Ferdinando Dianzani)**

*F. Dianzani*

Elenco dei membri del Comitato Etico, relative qualifiche e presenze nella seduta del 18/12/2003:

|   |   |                 |                               |                                                                                                           |
|---|---|-----------------|-------------------------------|-----------------------------------------------------------------------------------------------------------|
| P | A | PRESIDENTE      | Prof. Ferdinando DIANZANI     | Professore Ordinario di Virologia, Preside Facoltà di Medicina Libera Università Campus Bio-Medico        |
| X | A | VICE PRESIDENTE | Dott.ssa Carlotta MELOCCHI    | Coordinatrice Consulta Romana per l'HIV                                                                   |
| X | A | COMPONENTE      | Prof. Luciano ANGELUCCI       | Professore Ordinario di Farmacologia Medica Università degli Studi di Roma La Sapienza                    |
| X | A | COMPONENTE      | Prof. Ferdinando ANTONIOTTI   | Professore Emerito di Medicina Legale fuori ruolo Università degli Studi di Roma La Sapienza              |
| X | A | COMPONENTE      | Dott. Pier Luigi BARTOLETTI   | Esperto di medicina generale territoriale                                                                 |
| X | A | COMPONENTE      | Dott.ssa Caterina DI VIGGIANO | Rappresentante Coordinamento Diritti del Cittadino                                                        |
| X | A | COMPONENTE      | Dott. Giuseppe IPPOLITO       | Direttore Scientifico I.N.M.I. Lazzaro Spallanzani I.R.C.C.S.                                             |
| X | A | COMPONENTE      | Avv. Giuseppe LA GRECA        | Presidente aggiunto onorario della Corte Suprema di Cassazione                                            |
| X | A | COMPONENTE      | Dott.ssa Patrizia RELLECATI   | Responsabile Servizio Farmaceutico I.N.M.I. Lazzaro Spallanzani I.R.C.C.S.                                |
| X | A | COMPONENTE      | Dott. Giovanni REZZA          | Direttore Centro Operativo AIDS Istituto Superiore di Sanità                                              |
| X | A | COMPONENTE      | Dott. Salvatore SQUARCIONE    | Direttore Sanitario I.N.M.I. Lazzaro Spallanzani I.R.C.C.S.                                               |
| X | A | COMPONENTE      | Dott. Vittoradolfo TAMBONE    | Esperto di Bioetica, Dipartimento di Antropologia ed Etica applicata, Libera Università Campus Bio-Medico |

Ufficio di segreteria:

|   |   |                           |                            |                                                                                                      |
|---|---|---------------------------|----------------------------|------------------------------------------------------------------------------------------------------|
| P | A | SEGRETARIO SCIENTIFICO    | Dott. Enrico GIRARDI       | Vice Direttore Scientifico I.N.M.I. Lazzaro Spallanzani I.R.C.C.S.                                   |
| X | A | SEGRETARIO AMMINISTRATIVO | Dott.ssa Lorena FIORENTINI | Collaboratore Amministrativo presso la Direzione Scientifica I.N.M.I. Lazzaro Spallanzani I.R.C.C.S. |
